# Supplementary material for: Infective Endocarditis Due to Kingella kingae
Source: MDPI journal article supplement (doi:10.3390/microorganisms12010164), 2024-01-13
Supplement: s1 [file s1]

## Supplemental Digital Content

**Table S1.** Comparison of 2015 (children) and 2023 (adults) diagnostic criteria for infective endocarditis. Shaded cells indicate that no modifications have been made between the two versions. IE: infective endocarditis, HACEK: *Haemophilus*, *Aggregatibacter*, *Cardiobacterium*, *Eikenella*, and *Kingella*, TEE: transesophageal echocardiography, TTE: transthoracic echocardiography, CT: computed tomography, [18F]-FDG-PET/CT: <sup>18</sup>F-fluorodeoxyglucose positron emission tomography, WBC SPECT/CT: white blood cell single photon emission tomography.

| Modified Duke Criteria<br>(2015 AHA Guideline for Management of<br>Infective Endocarditis in Children and Adults)                                                                                 | 2023 European Society of Cardiology modified<br>diagnostic criteria                                                                                                                                                                                                                                                                                           |
|---------------------------------------------------------------------------------------------------------------------------------------------------------------------------------------------------|---------------------------------------------------------------------------------------------------------------------------------------------------------------------------------------------------------------------------------------------------------------------------------------------------------------------------------------------------------------|
| <b>Major criteria</b>                                                                                                                                                                             |                                                                                                                                                                                                                                                                                                                                                               |
| 1. Positive blood culture for IE                                                                                                                                                                  |                                                                                                                                                                                                                                                                                                                                                               |
| A. Typical microorganism consistent with IE from ≥2 blood cultures, as noted below                                                                                                                | Typical microorganisms consistent with IE from two separate blood cultures: <ul style="list-style-type: none"> <li>- Oral streptococci</li> <li>- <i>Streptococcus gallolyticus</i> (formerly <i>S. bovis</i>)</li> <li>- HACEK group</li> <li>- <i>S. aureus</i></li> <li>- <i>E. faecalis</i> (acknowledged as a typical endocarditis bacterium)</li> </ul> |
| (I) Viridans streptococci, <i>Streptococcus bovis</i> , or HACEK group                                                                                                                            |                                                                                                                                                                                                                                                                                                                                                               |
| (II) Community-acquired <i>Staphylococcus aureus</i> or enterococci, in the absence of a primary focus                                                                                            |                                                                                                                                                                                                                                                                                                                                                               |
| B. Microorganisms consistent with IE from persistently positive blood cultures, defined as:                                                                                                       |                                                                                                                                                                                                                                                                                                                                                               |
| (I) ≥2 Positive cultures of blood samples drawn >12 hours apart                                                                                                                                   |                                                                                                                                                                                                                                                                                                                                                               |
| (II) All of 3 or a majority of ≥4 blood cultures, (with first and last samples drawn ≥1 hour apart).                                                                                              |                                                                                                                                                                                                                                                                                                                                                               |
| (III) Single positive blood culture for <i>Coxiella burnetii</i> or antiphase-I immunoglobulin G antibody titer >1:800                                                                            |                                                                                                                                                                                                                                                                                                                                                               |
| 2. Evidence of endocardial involvement/Imaging positive for IE                                                                                                                                    |                                                                                                                                                                                                                                                                                                                                                               |
| A. Positive echocardiogram (TEE recommended in prosthetic valves, rated at least possible IE by clinical criteria, or complicated IE; TTE as the first test in other patients) for IE, defined as | Valvular, perivalvular/periprosthetic and foreign material anatomic and metabolic lesions characteristic of IE detected by any of the following imaging techniques: <ul style="list-style-type: none"> <li>- Echocardiography (TTE and TEE).</li> <li>- Cardiac CT.</li> <li>- [18F]-FDG-PET/CT.</li> <li>- WBC SPECT/CT.</li> </ul>                          |
| (I) Oscillating intracardiac mass on valve or supporting structures, in the path of regurgitant jets, or on implanted material in the absence of an alternative anatomic explanation              |                                                                                                                                                                                                                                                                                                                                                               |
| or                                                                                                                                                                                                |                                                                                                                                                                                                                                                                                                                                                               |
| (II) Abscess                                                                                                                                                                                      |                                                                                                                                                                                                                                                                                                                                                               |

|                                                                                                                                                                                     |  |
|-------------------------------------------------------------------------------------------------------------------------------------------------------------------------------------|--|
| or                                                                                                                                                                                  |  |
| (III) New partial dehiscence of prosthetic valve                                                                                                                                    |  |
| or                                                                                                                                                                                  |  |
| B. New valvular regurgitation (worsening or changing of preexisting murmur not sufficient)                                                                                          |  |
| <b>Minor criteria</b>                                                                                                                                                               |  |
| 1. Predisposition: predisposing heart condition or IV drug use                                                                                                                      |  |
| 2. Fever: temperature $\geq 38.0^{\circ}\text{C}$                                                                                                                                   |  |
| 3. Vascular phenomena: major arterial emboli, septic pulmonary infarcts, mycotic aneurysm, intracranial hemorrhage, conjunctival hemorrhages, and Janeway lesions                   |  |
| 4. Immunologic phenomena: glomerulonephritis, Osler nodes, Roth's spots, and rheumatoid factor                                                                                      |  |
| 5. Microbiological evidence: positive blood culture but does not meet a major criterion as noted above or serological evidence of active infection with organism consistent with IE |  |
| <b>IE Classification (at admission and during follow-up)</b>                                                                                                                        |  |
| Definite: <ul style="list-style-type: none"> <li>- 2 major criteria.</li> <li>- 1 major criterion and at least 3 minor criteria.</li> <li>- 5 minor criteria.</li> </ul>            |  |
| Possible: <ul style="list-style-type: none"> <li>- 1 major criterion and 1 or 2 minor criteria.</li> <li>- 3–4 minor criteria.</li> </ul>                                           |  |
| Rejected: <ul style="list-style-type: none"> <li>- Does not meet criteria for definite or possible at admission with or without a firm alternative diagnosis.</li> </ul>            |  |
